# Supplementary material for: Anaerobic Digestion of Cigarette Butts: Microbial Community Analysis and Energy Production Estimation
Source: MDPI journal article supplement (doi:10.3390/en14248290), 2021-12-09
Supplement: s1 [file s1]

Archive with 1 entries (1 files):
- energies-1466034-supplementary.pdf
